# Supplementary material for: Stereoselective Voltammetric Biosensor for Myo-Inositol and D-Chiro-Inositol Recognition
Source: MDPI journal article supplement (doi:10.3390/s23229211), 2023-11-16
Supplement: s1 [file s1]

Supplementary materials

# Stereoselective voltammetric biosensor for myo-inositol and D-chiro-inositol recognition

Cristina Tortolini<sup>a</sup>, Valeria Gigli<sup>a</sup>, Flavio Rizzo<sup>a</sup>, Andrea Lenzi<sup>a</sup>, Mariano Bizzarri<sup>a</sup>, Antonio Angeloni<sup>a</sup> and Riccarda Antiochia<sup>2b\*</sup>

<sup>a</sup>Department of Experimental Medicine, “Sapienza”, University of Rome, V.le Regina Elena 324, 00161 Rome, Italy

<sup>b</sup>Department of Chemistry and Drug Technologies, “Sapienza”, University of Rome, P.le Aldo Moro 5, 00185 Rome, Italy

\* Correspondence: [riccarda.antiochia@uniroma1.it](mailto:riccarda.antiochia@uniroma1.it) (R.Antiochia)

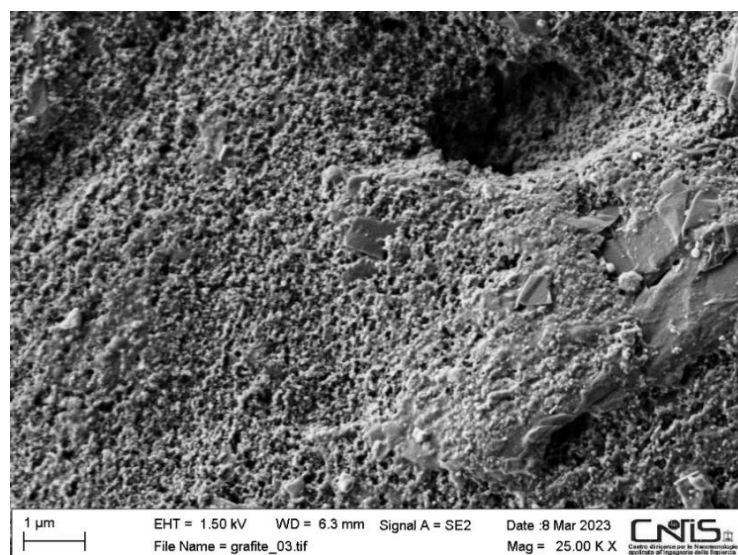

**Figure S1.** SEM image of bare GSPE. Experimental conditions: magnification 25 K X; voltage 1.50 kV.

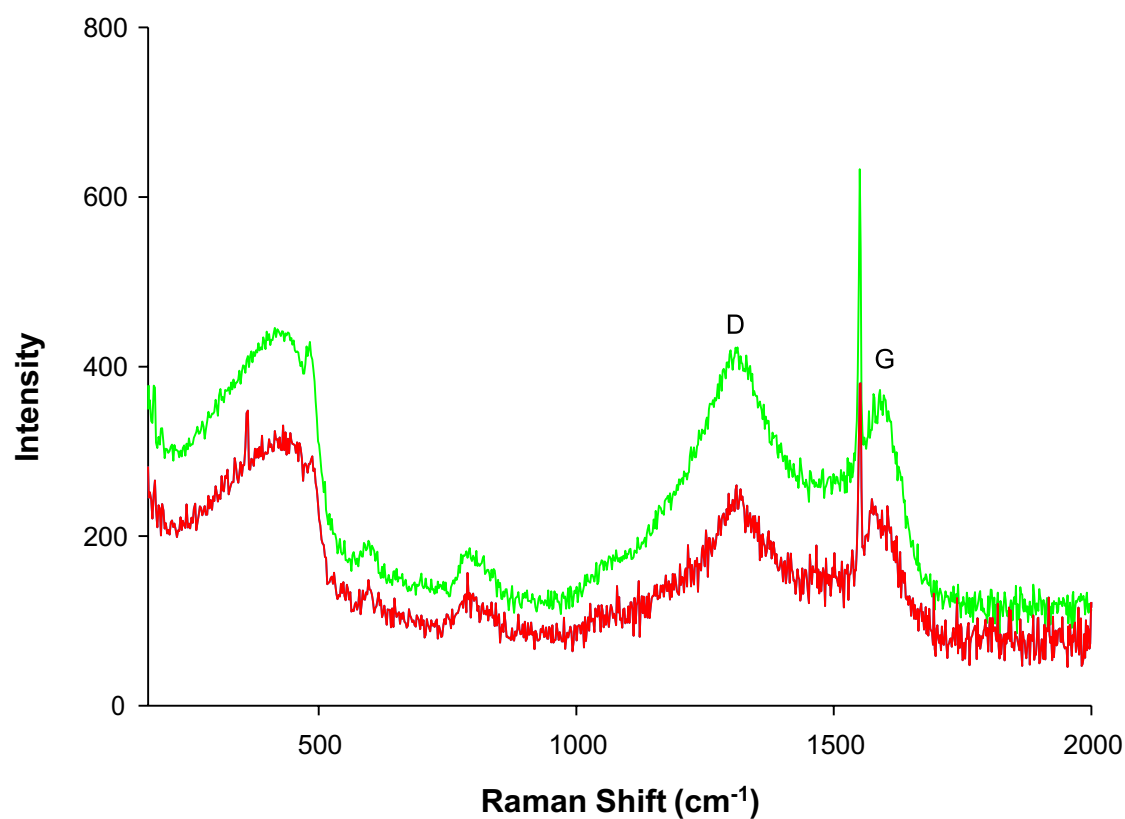

Figure S2. Raman spectra of bare GSPE (green) and MWCNTs/GSPE (red).

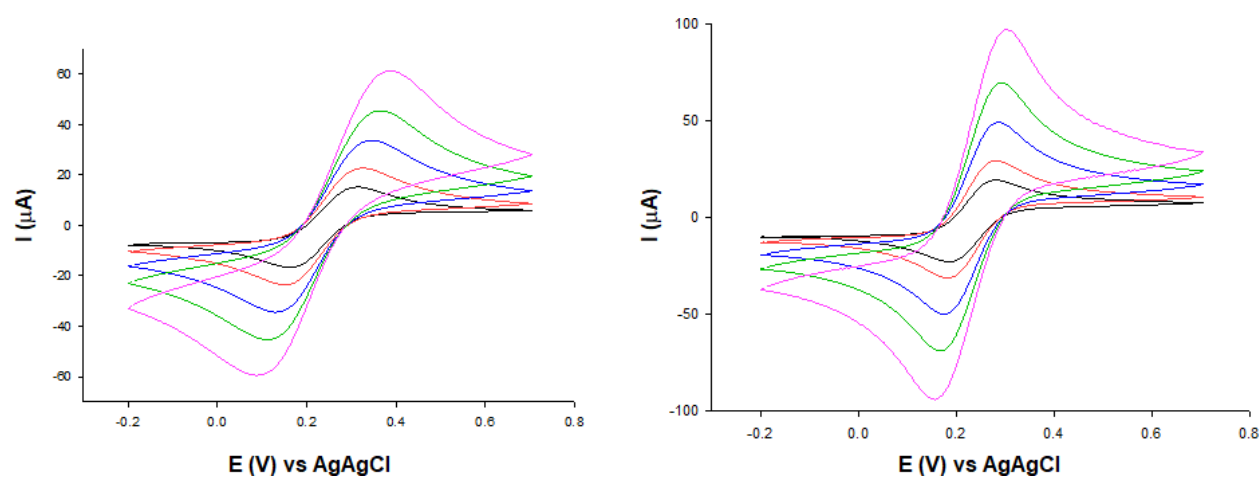

Figure S3. Scan rate effect of: (left) SPGE and (right) MWCNTs/SPGE at 5 mV s<sup>-1</sup> (black line), 10 mV s<sup>-1</sup> (red line), 25 mV s<sup>-1</sup> (blue line), 50 mV s<sup>-1</sup> (green line) and 100 mV s<sup>-1</sup> (pink line). Redox probe: 5mM [Fe(CN)<sub>6</sub>]<sup>3-/4-</sup> containing 0.1 M KCl solution.

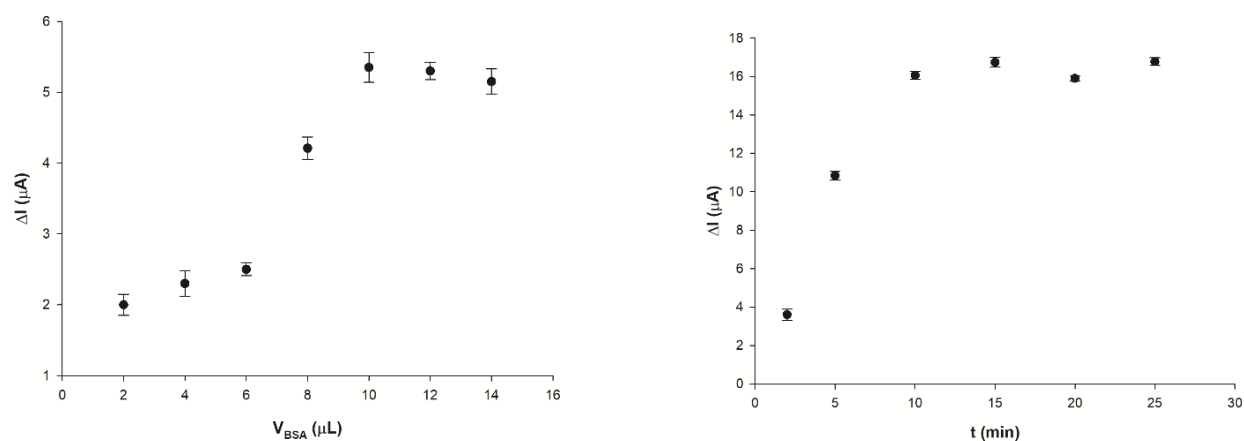

**Figure S4.** Relationship between (left) the volume of BSA and (right) the incubation time of BSA vs. the peak response in PBS 50 mM, pH 7.0 containing 50  $\mu\text{M}$  of myo-inositol.

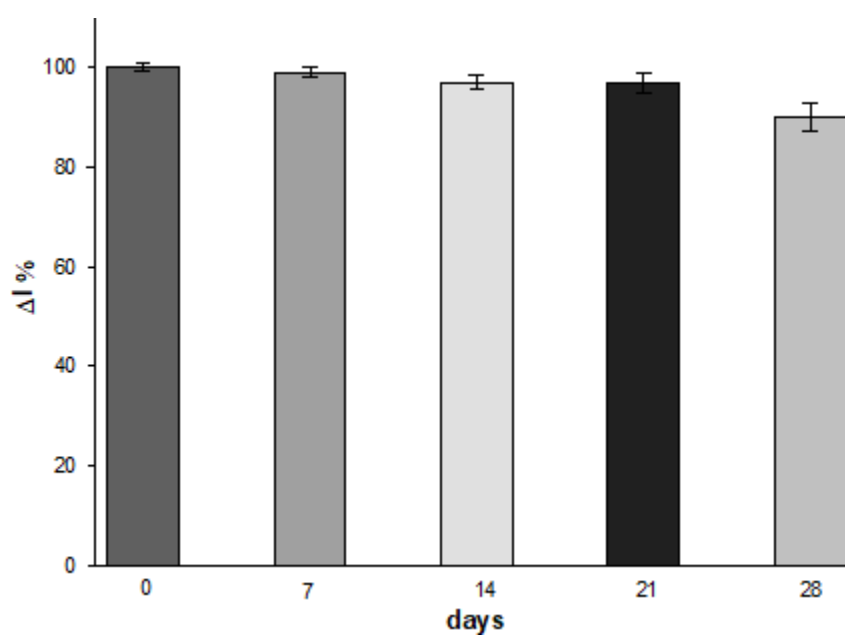

**Figure S5.** Stability of BSA/MB/MWCNTs/GSPE at 4 °C ( $n=6$ ), in presence of 50  $\mu\text{M}$  myo-Ins.

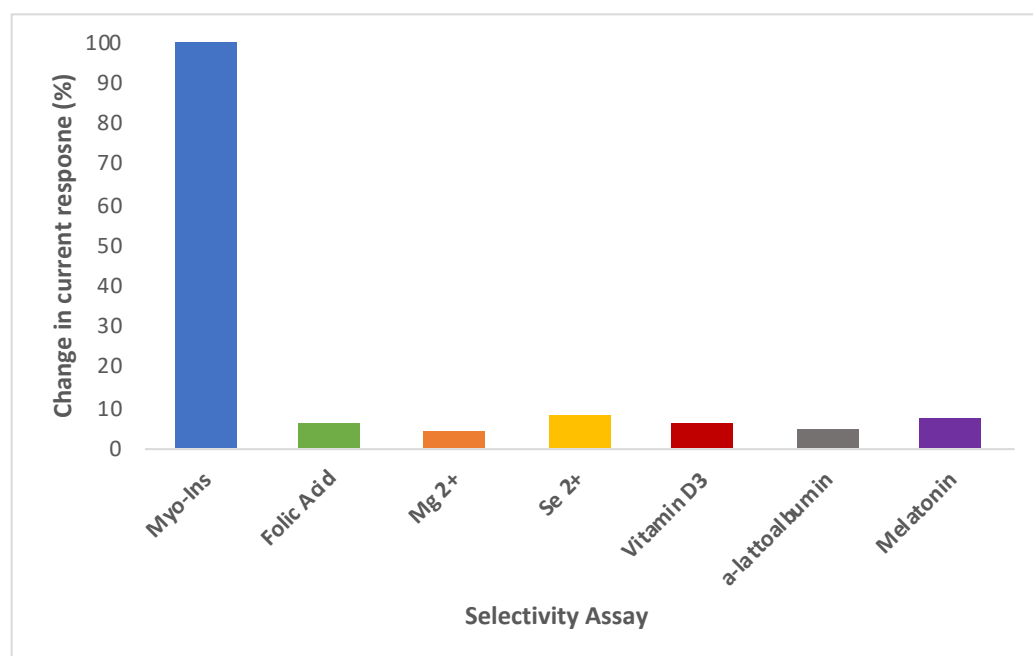

**Figure S6.** Histograms of selectivity assay for Myo-Ins vs. different interferent compounds. Experimental conditions: DPV experiments in Zobel's solution; myo-Ins: 50  $\mu$ M; all other compounds: 0.5 mM.

**Table S1.** Information about the manufacturer and ingredients of commercial pharmaceutical preparations containing Myo-Ins and D-chiro-Ins.

| Pharmaceutical preparation | Commercial name and Manufacturer        | Ingredients (for 1 capsule)                                                                                          |
|----------------------------|-----------------------------------------|----------------------------------------------------------------------------------------------------------------------|
| Preparation 1              | Kirocomplex,<br>S& R Pharmaceuticals    | D-Chiro-Ins 500 mg<br>Myo-Ins 200 mg<br>Mg <sup>2+</sup> 5 mg<br>Folic Acid 200 µg<br>Vitamin D <sub>3</sub> 12.5 µg |
| Preparation 2              | Tiroxil 4.0,<br>Lo.Li Pharma S.r.l.     | Myo-Ins 600 mg<br>Se <sup>2+</sup> 83 µg                                                                             |
| Preparation 3              | Inofert Combi Hp,<br>Italfarmaco S.p.A. | Myo-Ins 550 mg<br>D-chiro-Ins 15 mg<br>Folic Acid 200 µg                                                             |
| Preparation 4              | Eufertix,<br>Pharmaspeed                | α-Lattoalbumin 14.1 mg<br>Myo-Ins 2000 mg<br>D-chiro-Ins 50 mg<br>Folic Acid 400 µg<br>Melatonin 1 mg                |
